# Supplementary material for: Understanding 6th-century barbarian social organization and migration through paleogenomics
Source: PubMed Central journal article supplement (PMC6134036; doi:10.1038/s41467-018-06024-4), 2018-09-11
Supplement: 41467_2018_6024_MOESM3_ESM.pdf [file 41467_2018_6024_MOESM3_ESM.pdf]

## **Description of Additional Supplementary Files**

File Name: Supplementary Data 1

Description: Summary statistics for samples sequenced in this study.

File Name: Supplementary Data 2

Description: List of previously published ancient samples used in this study.

File Name: Supplementary Data 3

Description: Alignment of the variable SNPs from 37 medieval and 1 Bronze age individuals.

File Name: Supplementary Data 4

Description: Most likely modern population assigned to each ancient sample test using PAA.

File Name: Supplementary Data 5

Description: . Kinship coefficients and ks for putatively related individuals.
